# Supplementary material for: Photoelectrochemical Properties of Annealed Anodic TiO2 Layers Covered with CuOx
Source: MDPI journal article supplement (doi:10.3390/molecules27154789), 2022-07-26
Supplement: s1 [file s1]

# Supplementary Materials

## Photoelectrochemical Properties of Annealed Anodic TiO<sub>2</sub> Layers Covered with CuO<sub>x</sub>

Karolina Syrek \*, Monika Sołtys-Mróz, Kinga Pawlik, Magdalena Gurgul and Grzegorz D. Sulka

*Department of Physical Chemistry & Electrochemistry, Jagiellonian University, Faculty of Chemistry, Gronostajowa 2, 30387 Krakow, Poland*

\* Correspondence: syrek@chemia.uj.edu.pl

### 1. Morphology of TiO<sub>2</sub> layers

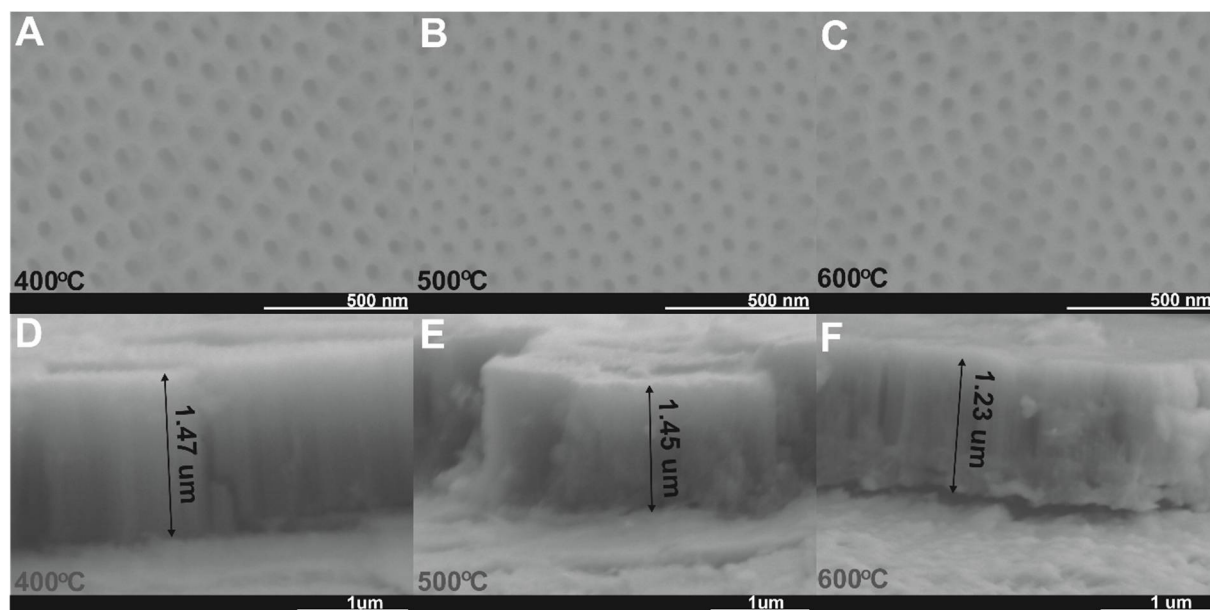

**Figure S1.** Top (A-C) and cross-sectional views of anodic TiO<sub>2</sub> layers annealed at 400 °C (A,D), 500 °C (B,E), and 600 °C (C,F).
